# Supplementary material
Source: PubMed Central journal article supplement (PMC3468670)
Supplement: NIHMS409468-supplement-1_si_001.pdf [file NIHMS409468-supplement-1_si_001.pdf]

## Supporting Information

### Femtosecond Conical Intersection Dynamics of Tryptophan in Proteins and Validation of Slowdown of Hydration Layer Dynamics

Jin Yang,<sup>†</sup> Luyuan Zhang,<sup>†</sup> Lijuan Wang and Dongping Zhong\*

Department of Physics, Department of Chemistry and Biochemistry, and Programs of Biophysics, Chemical Physics, and Biochemistry, The Ohio State University, Columbus, OH 43210, United States

#### Data Analysis

Upon 290-nm fs-pulse excitation, the two nearly degenerate states,  ${}^1L_a$  and  ${}^1L_b$ , will be excited coherently as a superposition state:  $|\Psi\rangle = \sqrt{n_a^*}|a\rangle + \sqrt{n_b^*}|b\rangle$ , where  $n_a^*$  and  $n_b^*$  are the relative probabilities of the  ${}^1L_a$  and  ${}^1L_b$  states, respectively, and  $n_a^* + n_b^* = 1$ .

Depending on how the coherence dephasing process and internal conversion dynamics evolve, various models could be proposed. Here, we assume that these two processes proceed in a parallel or sequential way, and build two corresponding models to simulate our experimental data. A detailed description of the two models is given as follows.

#### (1) Sequential model

In this model, we assumed that the population of the superposition state,  $n_c(t)$ , decays into the  ${}^1L_a$  and  ${}^1L_b$  states with a dephasing time  $T_2$ . After dephasing, the system can be treated with the mixed populations of the  ${}^1L_a$ ,  $n_a(t)$ , and  ${}^1L_b$ ,  $n_b(t)$ , states. As the fluorescence emission from the  ${}^1L_a$  state follows a multiple exponential decay due to solvation when gated at a certain wavelength (for example, 310 nm or 335 nm), the time-dependent populations of the three states can be written as:

$$n_c(t) = e^{-t/T_2} = c(t) \quad (S1)$$

$$n_a(t) = n_a^* \sum_i a_i \frac{\tau_i}{\tau_i - T_2} (e^{-t/\tau_i} - e^{-t/T_2}) = n_a^* a(t), \quad \sum_i a_i = 1 \quad (S2)$$

$$n_b(t) = n_b^* \frac{\tau_{IC}}{\tau_{IC} - T_2} (e^{-t/\tau_{IC}} - e^{-t/T_2}) = n_b^* b(t) \quad (S3)$$

For molecules that are initially excited in the  ${}^1L_b$  state and then transferred to the  ${}^1L_a$  state via conical intersection, the population is named  $n_{ba}(t)$  as follows,

$$n_{ba}(t) = n_b^* \sum_i a_i \left[ \frac{\tau_i}{\tau_{IC} - T_2} \left( \frac{\tau_{IC}}{\tau_{IC} - \tau_i} e^{-t/\tau_{IC}} - \frac{T_2}{T_2 - \tau_i} e^{-t/T_2} \right) + \frac{\tau_i^2}{(\tau_{IC} - \tau_i)(T_2 - \tau_i)} e^{-t/\tau_i} \right] = n_b^* a_b(t) \quad (S4)$$

The parallel and perpendicular fluorescence signals from the superposition state  $|\Psi(t)\rangle$  can be easily derived, [1]

$$S_{//} = n_c(t) \left[ \frac{3}{5} (n_a^* \mu_a^2 + n_b^* \mu_b^2) + \frac{2}{5} \sqrt{n_a^* n_b^*} \mu_a \mu_b \cos(\Delta t) \right] f_c \quad (\text{S5})$$

$$S_{\perp} = n_c(t) \left[ \frac{1}{5} (n_a^* \mu_a^2 + n_b^* \mu_b^2) - \frac{1}{5} \sqrt{n_a^* n_b^*} \mu_a \mu_b \cos(\Delta t) \right] f_c \quad (\text{S6})$$

Similarly, the parallel and perpendicular fluorescence signals from the  ${}^1L_a$  and  ${}^1L_b$  state, as well as the  ${}^1L_a$  state that is transferred from the  ${}^1L_b$  state have the following forms, [2]

$$P_{//} = \frac{3}{5} (n_a(t) \mu_a^2 f_a + n_b(t) \mu_b^2 f_b) + \frac{1}{5} n_{ba}(t) \mu_a^2 f_{ba} \quad (\text{S7})$$

$$P_{\perp} = \frac{1}{5} (n_a(t) \mu_a^2 f_a + n_b(t) \mu_b^2 f_b) + \frac{2}{5} n_{ba}(t) \mu_a^2 f_{ba} \quad (\text{S8})$$

Here  $\mu_a$  and  $\mu_b$  are the emission transition dipoles of the  ${}^1L_a$  and  ${}^1L_b$  states, and  $f_c, f_a, f_b$  and  $f_{ba}$  are the emission coefficients of the superposition state, the  ${}^1L_a$  state,  ${}^1L_b$  state and  ${}^1L_a$  state that is transferred from  ${}^1L_b$  state at a given wavelength, respectively.  $\Delta$  is the angular frequency difference between the  ${}^1L_a$  and  ${}^1L_b$  states. Assuming the slow change of  $\cos(\Delta t)$  in the short time of  $\tau_{IC}$  and  $T_2$ , thus  $\cos(\Delta t) \approx 1$ . Finally, the total parallel and perpendicular signals are as follows.

$$I_{//} = S_{//} + P_{//} = n_c(t) \mu_a^2 \left[ \frac{3}{5} (n_a^* + \alpha^2 n_b^*) + \frac{2}{5} \alpha \sqrt{n_a^* n_b^*} \right] f_c + \frac{3}{5} [n_a(t) f_a + \alpha^2 n_b(t) f_b] + \frac{1}{5} n_{ba}(t) f_{ba} \quad (\text{S9})$$

$$I_{\perp} = S_{\perp} + P_{\perp} = n_c(t) \mu_a^2 \left[ \frac{1}{5} (n_a^* + \alpha^2 n_b^*) - \frac{1}{5} \alpha \sqrt{n_a^* n_b^*} \right] f_c + \frac{1}{5} [n_a(t) f_a + \alpha^2 n_b(t) f_b] + \frac{2}{5} n_{ba}(t) f_{ba} \quad (\text{S10})$$

where  $\alpha = \mu_b / \mu_a$ . Furthermore, we define  $N_a^0 = \frac{n_a^*}{n_b^*}$ ,  $\beta_1 = \frac{f_a}{f_{ba}}$ ,  $\beta_2 = \frac{f_b}{f_{ba}}$ ,  $\beta_3 = \frac{f_c}{f_{ba}}$  and will get

$$r(t) = \frac{I_{//} - I_{\perp}}{I_{//} + 2I_{\perp}} = \frac{[2(N_a^0 + \alpha^2) + 3\alpha\sqrt{N_a^0}]c(t)\beta_3 + 2[N_a^0 a(t)\beta_1 + \alpha^2 b(t)\beta_2] - a_b(t)}{5[(N_a^0 + \alpha^2)c(t)\beta_3 + N_a^0 a(t)\beta_1 + \alpha^2 b(t)\beta_2 + a_b(t)]} \quad (\text{S11})$$

When  $t=0$ ,  $c(t)=1$ ,  $a(t)=b(t)=a_b(t)=0$  and the anisotropy can be simplified as

$$r(0) = \frac{2}{5} + \frac{3\alpha\sqrt{N_a^0}}{5(N_a^0 + \alpha^2)} \quad (\text{S12})$$

Assuming  $\alpha = \mu_b / \mu_a = 1$ ,  $N_a^0 = n_a^* / n_b^* = 1$ , we will get  $r(0)=0.7$ , which is consistent with ref. 1. As for tryptophan, the typical values of  $\alpha$  and  $N_a^0$  are 0.455 and 1.2 (at 290-nm excitation), thus we get  $r(0)=0.61$ . However, it is important to note that the experimental value appears much smaller than the calculated value of 0.61 due to the actual temporal resolution.

When  $t \gg T_2, \tau_{IC}$ ,  $c(t)=b(t)=0$ ,  $a(t) \approx a_b(t)$  and the anisotropy is

$$r(t) = \frac{2N_a^0\beta_1 - 1}{5(N_a^0\beta_1 + 1)} \quad (\text{S13})$$

Therefore, the plateau value of  $r(t)$  after the coherence dephasing and CI dynamics is directly related to  $N_a^0\beta_1$ , *i.e.*,  $\frac{n_a^*f_a}{n_b^*f_{ba}}$ . If  $f_a=f_{ba}$  and  $\frac{n_a^*}{n_b^*} = 1.2$ ,  $r=0.127$  for the initial plateau.

## (2) Parallel model

In this model, the key assumption is that the population flow is not necessary to start after dephasing. Instead, the CI dynamics and the dephasing process occur simultaneously. The time-dependent population of the  $^1L_a$  state,  $^1L_b$  state and  $^1L_a$  state that is transferred from  $^1L_b$  state are

$$n_a(t) = n_a^* \sum_i a_i e^{-t/\tau_i} = n_a^* a(t), \quad \sum_i a_i = 1 \quad (\text{S14})$$

$$n_b(t) = n_b^* e^{-t/\tau_{IC}} = n_b^* b(t) \quad (\text{S15})$$

$$n_{ba}(t) = n_b^* \sum_i a_i \frac{\tau_i}{\tau_i - \tau_{IC}} (e^{-t/\tau_i} - e^{-t/\tau_{IC}}) = n_b^* a_b(t) \quad (\text{S16})$$

Meantime, there is an interference term in the fluorescence emission

$$I_{in}(t) = \sqrt{n_a^* n_a^*} \sum_i a_i e^{-t(\frac{1}{2\tau_{IC}} + \frac{1}{T_2} + \frac{1}{2\tau_i})} \cos(\Delta t) \approx \sqrt{n_a^* n_a^*} \sum_i a_i e^{-t(\frac{1}{2\tau_{IC}} + \frac{1}{T_2} + \frac{1}{2\tau_i})} = \sqrt{n_a^* n_a^*} l(t) \quad (\text{S17})$$

Similarly, we can get

$$I_{//} = \frac{3}{5}[n_a(t)f_a + \alpha^2 n_b(t)f_b] + \frac{2}{5}\alpha \sqrt{n_a^* n_b^*} l(t) \sqrt{f_a f_b} + \frac{1}{5} n_{ba}(t) f_{ba} \quad (\text{S18})$$

$$I_{\perp} = \frac{1}{5}[n_a(t)f_a + \alpha^2 n_b(t)f_b] - \frac{1}{5}\alpha \sqrt{n_a^* n_b^*} l(t) \sqrt{f_a f_b} + \frac{2}{5} n_{ba}(t) f_{ba} \quad (\text{S19})$$

$$r(t) = \frac{I_{//} - I_{\perp}}{I_{//} + 2I_{\perp}} = \frac{2[N_a^0 a(t)\beta_1 + \alpha^2 b(t)\beta_2] + 3\alpha \sqrt{N_a^0 \beta_1 \beta_2} l(t) - a_b(t)}{5[N_a^0 a(t)\beta_1 + \alpha^2 b(t)\beta_2 + a_b(t)]} \quad (\text{S20})$$

The definitions of  $f_a, f_b, f_{ba}, \alpha, \beta_1, \beta_2$  are the same as defined in the sequential model.

When  $t=0$ ,  $a(t)=b(t)=l(t)=1$ ,  $a_b(t)=0$  and thus we have

$$r(0) = \frac{2}{5} + \frac{3\alpha\sqrt{N_a^0\beta_1\beta_2}}{5(N_a^0\beta_1 + \alpha^2\beta_2)} \quad (\text{S21})$$

Assuming  $\beta_1=\beta_2=1$ ,  $r(0)$  will be the same as eq. S12 in the sequential model.

When  $t \gg T_2, \tau_{IC}$ ,  $b(t)=l(t)=0$ ,  $a(t) \approx a_b(t)$  and

$$r(t) = \frac{2N_a^0\beta_1 - 1}{5(N_a^0\beta_1 + 1)} \quad (\text{S22})$$

is the same as eq. S13 in the sequential model.

We simulated our experimental data with both models and found that the sequential model fits the data better while the parallel model has some deviation from the measured results. In Figure S1, the simulated anisotropies with the two models are compared with the experimental data for the mutant F30W gated at 310 nm. As shown clearly, the sequential model fits better than the parallel models. Therefore, the results presented in the main text are obtained from the simulations with the sequential model.

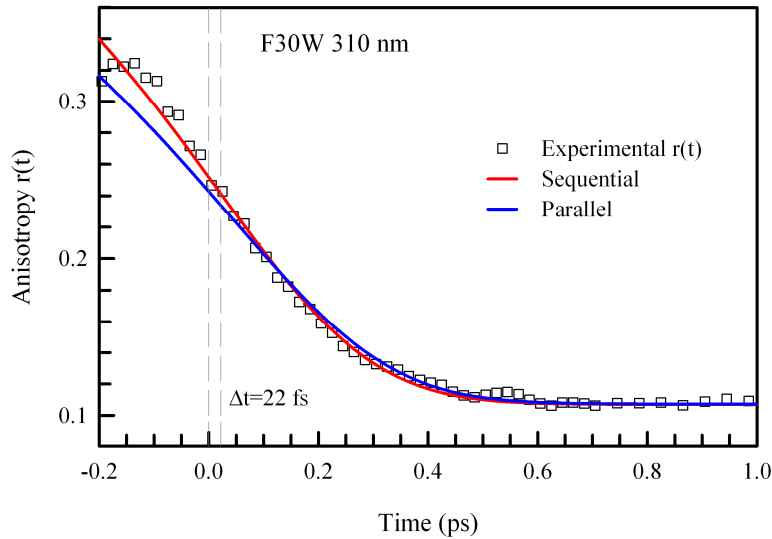

**Figure S1.** Simulated anisotropies of the mutant F30W at 310 nm with parallel (blue) and sequential (red) models compared with experimental data (squares).

## References

[1] Wynne, K.; Hochstrasser, R. M. *J. Raman Spectrosc.* **1995**, *26*, 561-569.

[2] Bräm, O.; Oskouei, A. A.; Tortschanoff, A.; van Mourik, F.; Madrid, M.; Echave, J.; Cannizzo, A.; Chergui, M. *J. Phys. Chem. A* **2010**, *114*, 9034-9042.
